# Supplementary material for: Combining implicit geological modeling, field surveys, and hydrogeological modeling to describe groundwater flow in a karst aquifer
Source: Springer Nature journal article supplement (doi:10.1007/s10040-020-02220-z), 2020-09-15
Supplement: MOESM1 [file 18382782]

# **Combining implicit geological modeling, field surveys, and hydrogeological modeling to describe groundwater flow in a karst aquifer**

Fernando M. D’Affonseca<sup>1,2</sup>, Michael Finkel<sup>1</sup>, Olaf A. Cirpka<sup>1</sup>

1. Center for Applied Geoscience, University of Tübingen, Hölderlinstr. 12, 72074 Tübingen. email: [olaf.cirpka@uni-tuebingen.de](mailto:olaf.cirpka@uni-tuebingen.de)
2. TIMGEO GmbH, Hölderlinstr. 29. 72074 Tübingen

## **Electronic supplementary material – Hydrogeology Journal**

This supplementary material includes a total of four figures (Figure S1 to Figure S4) that are referred to in the article.

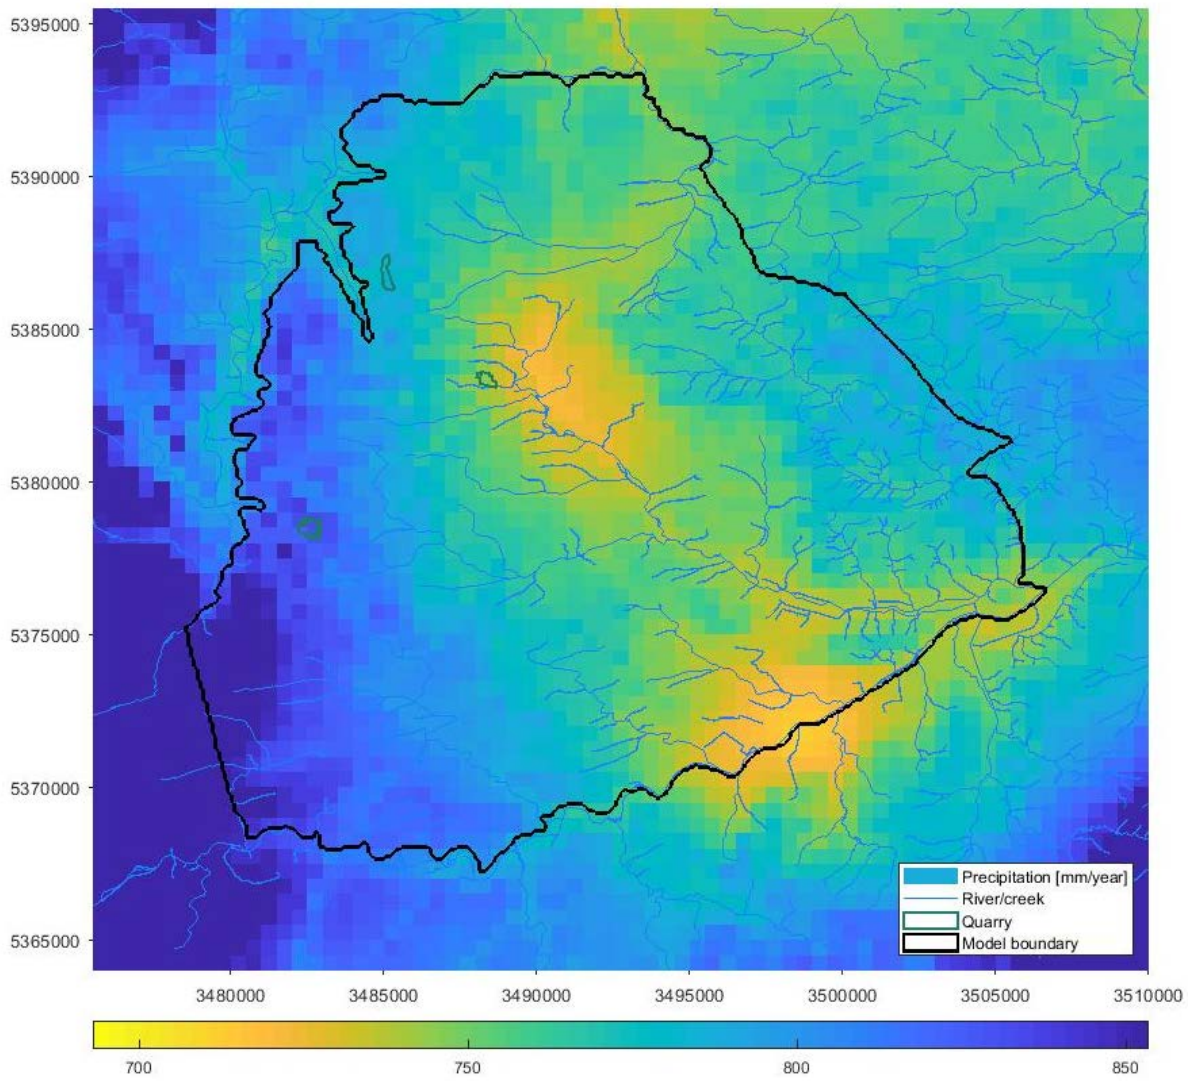

Figure S1 Average annual precipitation (mm/year) within period 2001 to 2015 in the study area (LUBW 2018).

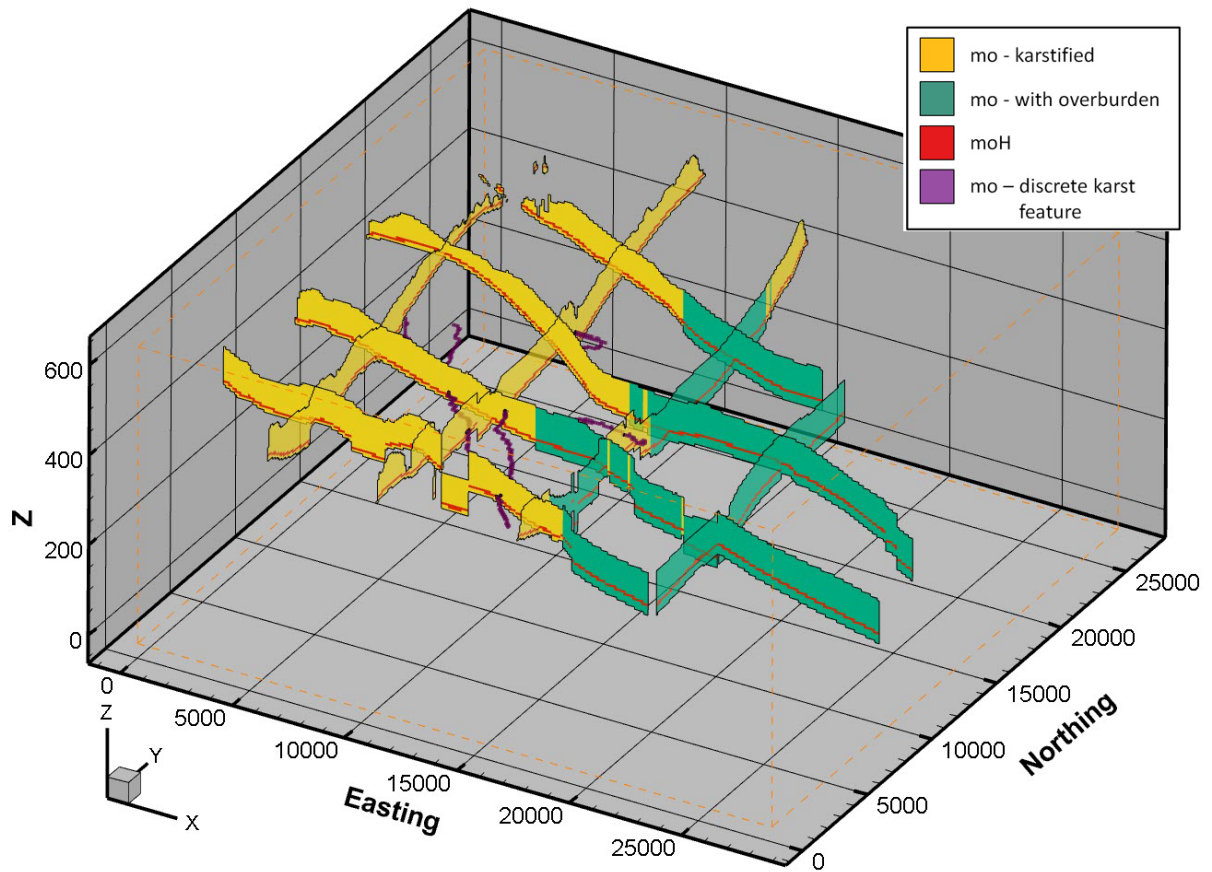

Figure S2 Zonation of conductivity within the Upper Muschelkalk. Various cross-sectional planes, view from southeast, local coordinates in meters.

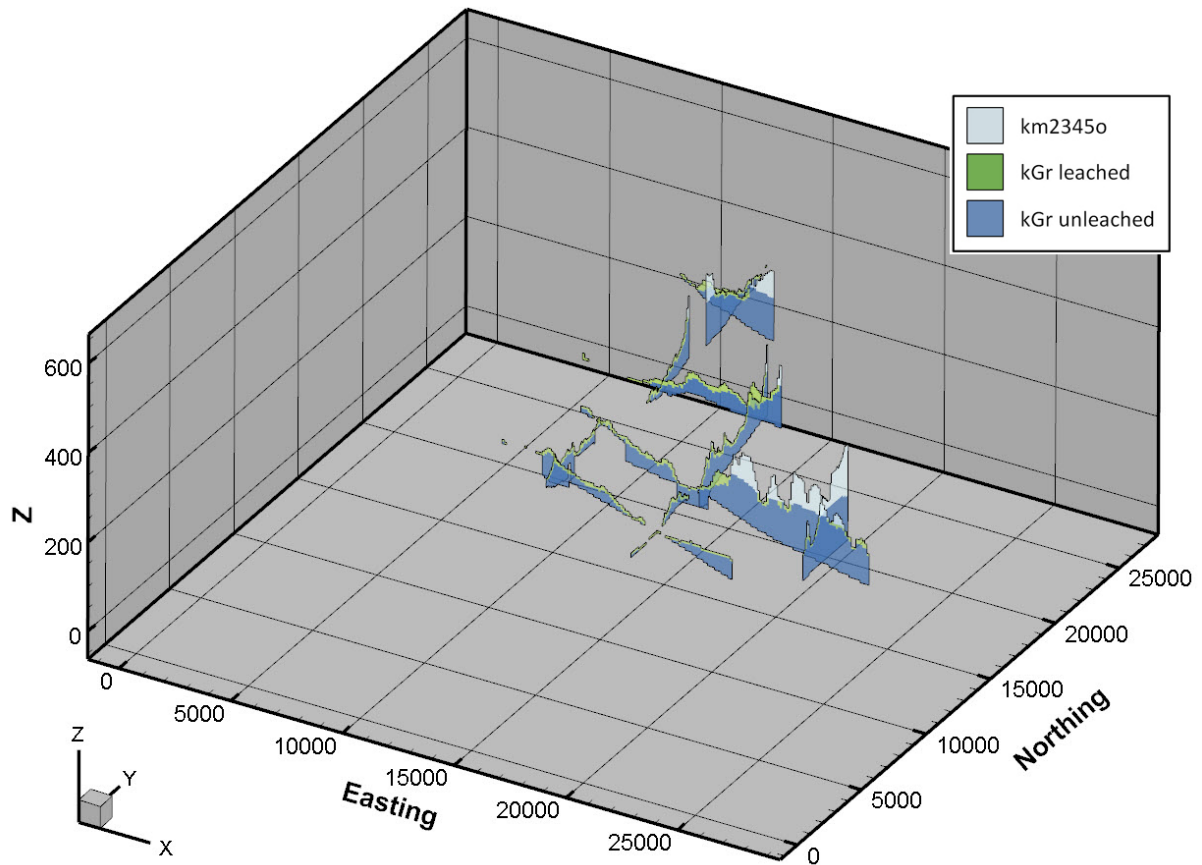

Figure S3 Zonation of conductivity within the Grabfeld formation (Middle Keuper). Various cross-sectional planes, view from southeast, local coordinates in meters.

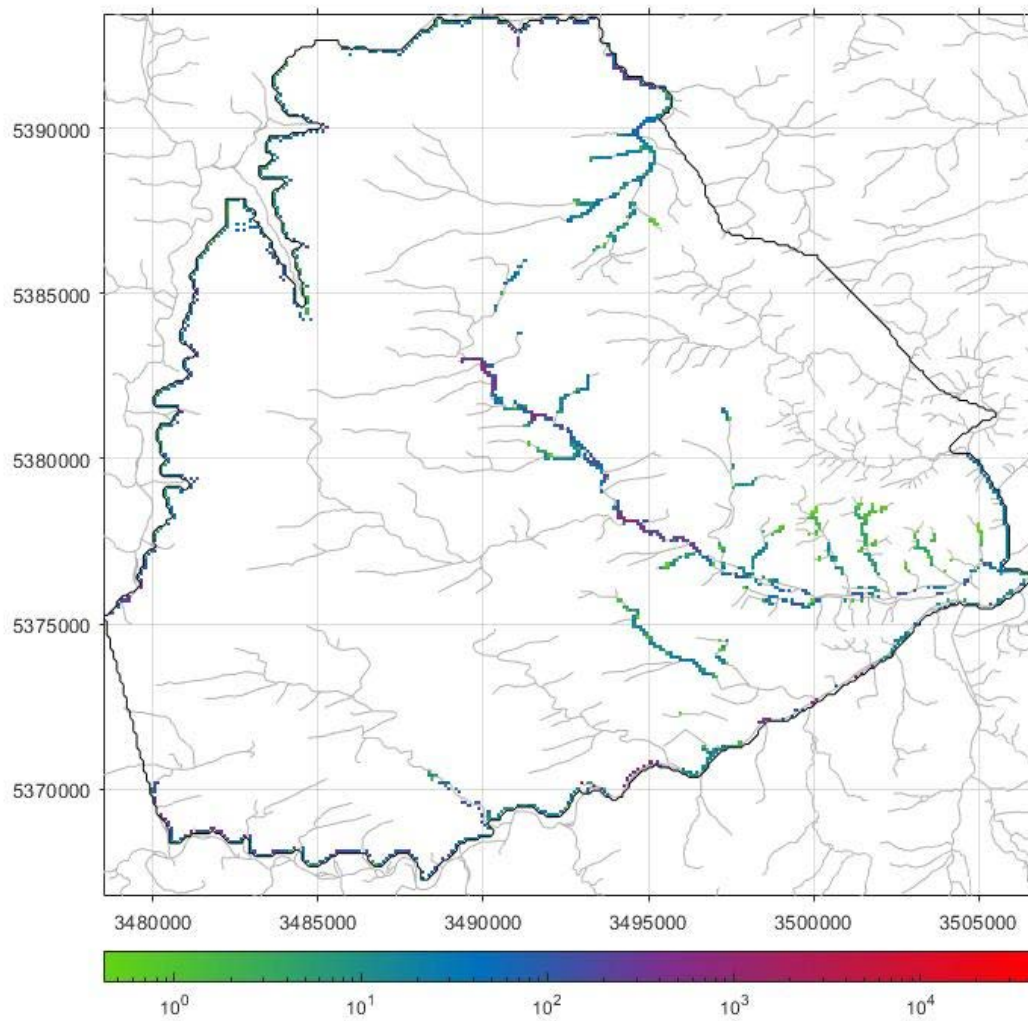

Figure S4 Discharge rate ( $\text{m}^3/\text{day}$ ) at active drains representing both springs and river stretches that gain groundwater under averaged hydrologic conditions.

### ESM Reference

LUBW (2018) Niederschlag und Temperatur im Untersuchungsgebiet (Precipitation and air temperature within the area of interest). Landesanstalt für Umwelt, Messungen und Naturschutz Baden-Württemberg. Data provided on 02 February 2018
